# Supplementary material
Source: PubMed Central journal article supplement (PMC7871441)
Supplement: ac0c01375_si_001.pdf [file ac0c01375_si_001.pdf]

# High-throughput fractionation coupled to mass spectrometry for improved quantitation in metabolomics.

Tom van der Laan, Anne-Charlotte Dubbelman, Kevin Duisters, Alida Kindt, Amy C. Harms and Thomas Hankemeier

Analytical Biosciences and Metabolomics, Division of Systems Biomedicine and Pharmacology, Leiden Academic Center for Drug Research, Leiden University, Leiden, 2333 CC, The Netherlands.

Corresponding Author: Thomas Hankemeier ([hankemeier@lacdr.leidenuniv.nl](mailto:hankemeier@lacdr.leidenuniv.nl))

## Contents:

Figure S1: Extracted ion chromatogram of phospholipids in negative mode

Figure S2: Chromatogram of creatinine(-D3)

Figure S3: Individual mean natural logarithm of metabolite classes over time

Table S1: Overview of calibration standards

Table S2: Overview of internal standards

Table S3: Solid-phase extraction column information

Table S4: LC and valve parameters for positive mode

Table S5: LC and valve parameters for negative mode

Table S6: Mass spectrometry parameters

Table S7: Overview of the different fractions

Table S8: Method validation parameters

Table S9: Matrix effect in fractionation, LLE-FIA and FIA

Table S10. The LLOQ of literature LC-MS methods

Table S11: Coverage of fractionation, RP-LC and HILIC-LC

Table S12: P-values of circadian rhythm and food intake application

## Phospholipids in negative fractionation

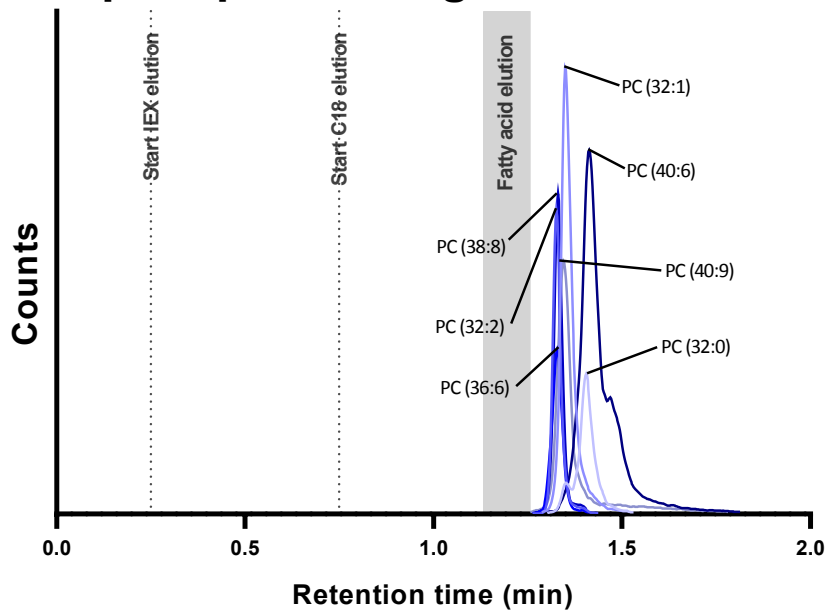

Figure S1. Extracted ion chromatogram of phospholipids in a pooled plasma sample measured by the negative fractionation method and positive MS polarity. The elution window of the fatty acids are indicated by the grey area.

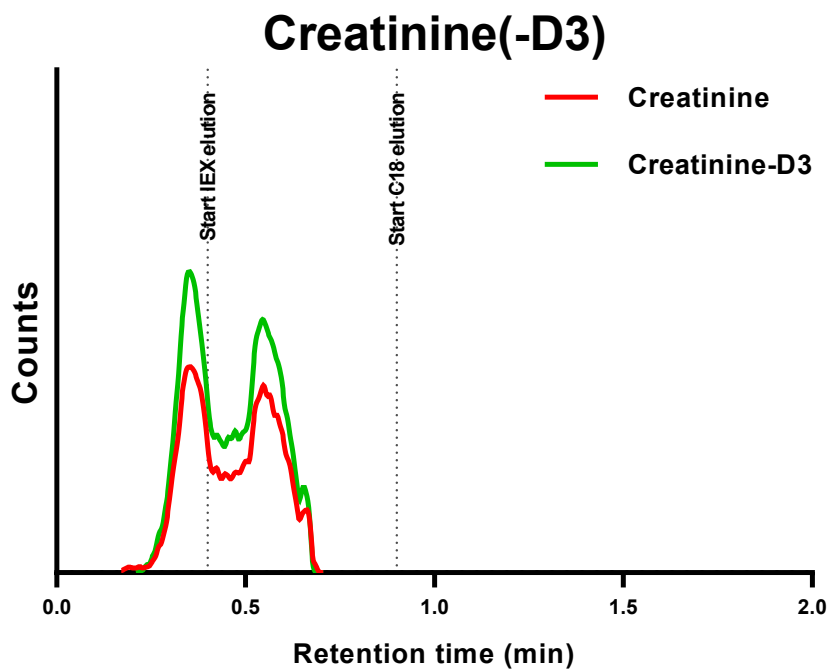

Figure S2. Extracted ion chromatogram of creatinine and creatinine-D3 measured by the fractionation method in a pooled plasma sample in positive mode. The peak shape and retention time are overlapping.

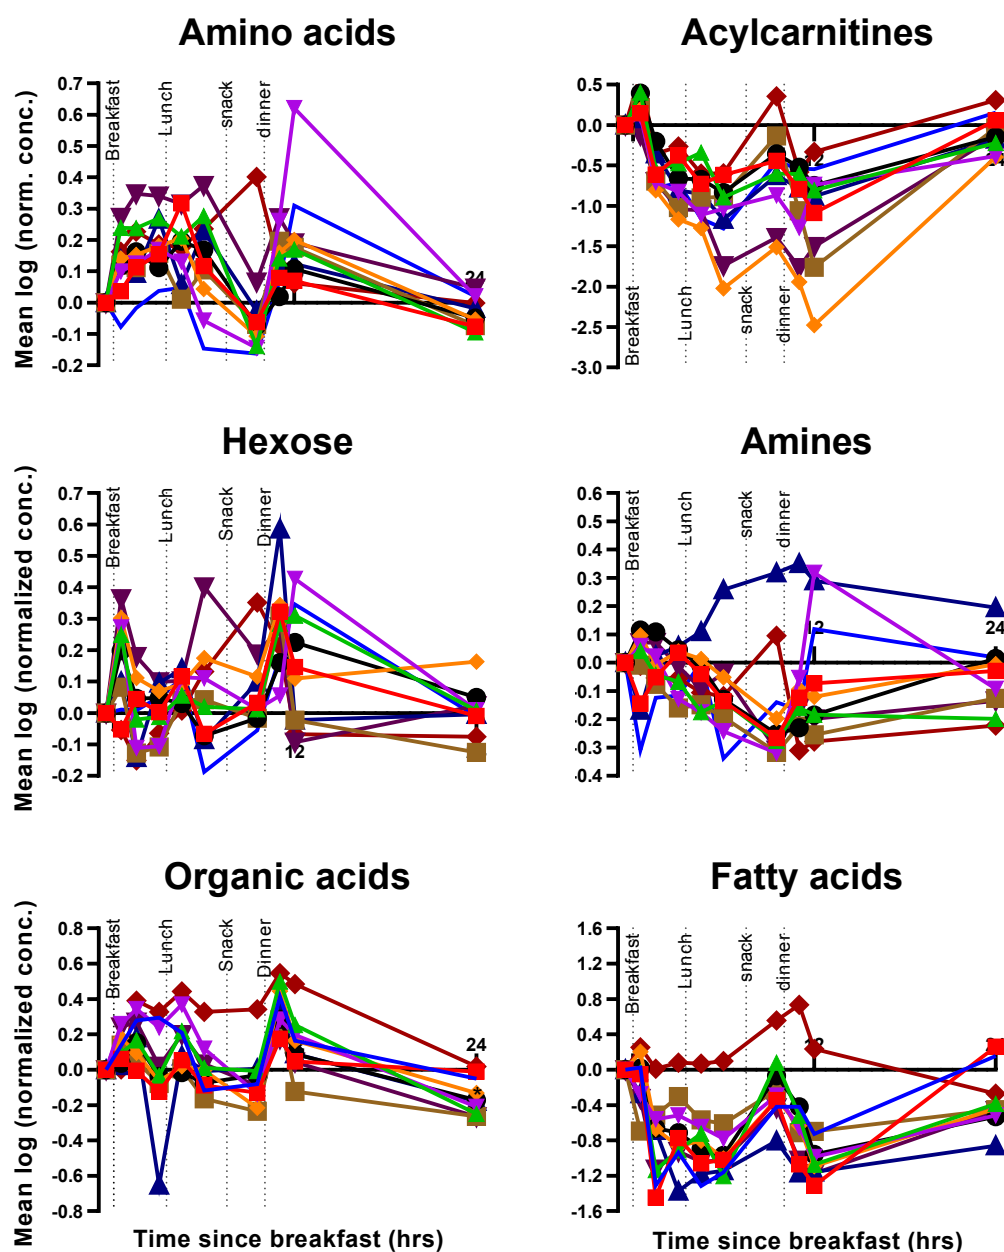

Figure S3. The individual mean natural logarithm of metabolite concentrations over time. Normalization was performed on the first time point. Within each compound class, metabolites were averaged per time point. The 10 volunteers are depicted in different colours. The time frame comprises four standardized feeding times and meals and one night rest. The time is presented with respect to the breakfast time.

**Table S1. Calibration standards**

| Name                    | CheBi ID | Standard                                      | Supplier          | Solvent                | C7 (µM) |
|-------------------------|----------|-----------------------------------------------|-------------------|------------------------|---------|
| 1-methylhistidine       | 70958    | 1-methylhistidine                             | HMDB              | Water                  | 80      |
| 3-methylhistidine       | 70959    | 3-methylhistidine                             | HMDB              | Water                  | 40      |
| Alanine                 | 16977    | L-alanine                                     | Sigma-Aldrich     | Water                  | 1600    |
| Arginine                | 16467    | L-arginine hydrochloride                      | Sigma-Aldrich     | Water                  | 400     |
| Betaine                 | 17750    | Betaine hydrochloride                         | Sigma-Aldrich     | Water                  | 300     |
| Carnitine               | 16347    | L-Carnitine hydrochloride                     | Sigma-Aldrich     | Water                  | 200     |
| Citrulline              | 16349    | Citrulline                                    | HMDB              | Water                  | 100     |
| Cystine                 | 16283    | L-cystine                                     | Fluka             | 1M Hydrochloric acid   | 100     |
| Glutamic acid           | 16015    | L-glutamic acid                               | Sigma-Aldrich     | Water                  | 400     |
| Glutamine               | 18050    | L-glutamine                                   | Fluka             | Water                  | 2000    |
| Histidine               | 15971    | L-histidine monohydrochloride monohydrate     | Fluka             | Water                  | 600     |
| Isoleucine              | 17191    | L-Isoleucine                                  | Fluka             | Water                  | 200     |
| Leucine                 | 15603    | L-Leucine                                     | Fluka             | Water                  | 200     |
| Lysine                  | 18019    | L-lysine monohydrochloride                    | Fluka             | Water                  | 800     |
| Methionine              | 16643    | L-methionine                                  | Fluka             | Water                  | 200     |
| Ornithine               | 15729    | L-Ornithine hydrochloride                     | Sigma-Aldrich     | Water                  | 400     |
| Phenylalanine           | 17295    | L-phenylalanine                               | Fluka             | Water                  | 300     |
| Proline                 | 17203    | L-proline                                     | Fluka             | Water                  | 800     |
| Serine                  | 17115    | L-serine                                      | Fluka             | Water                  | 600     |
| Taurine                 | 15891    | Taurine                                       | Fluka             | Water                  | 400     |
| Threonine               | 16857    | L-threonine                                   | Fluka             | Water                  | 600     |
| Tryptophan              | 16828    | L-tryptophan                                  | Sigma-Aldrich     | 0.5M hydrochloric acid | 200     |
| Tyrosine                | 17895    | L-tyrosine                                    | Fluka             | 1M hydrochloric acid   | 200     |
| Valine                  | 16414    | L-valine                                      | Fluka             | Water                  | 800     |
| TMAO                    | 15724    | Trimethylamine-N-oxide dihydrate              | Sigma-Aldrich     | Water                  | 100     |
| Choline                 | 15354    | Choline chloride                              | Sigma-Aldrich     | Water                  | 100     |
| Creatinine              | 16737    | Creatinine                                    | Sigma-Aldrich     | Water                  | 400     |
| Urea                    | 16199    | Urea                                          | Sigma-Aldrich     | Water                  | 10000   |
| Glucose                 | 17634    | D-(+)-glucose                                 | Sigma-Aldrich     | Water                  | 10000   |
| Guanine                 | 16235    | Guanine                                       | HMDB              | 0.1M sodium hydroxide  | 8       |
| Hypoxanthine            | 17368    | Hypoxanthine                                  | Sigma-Aldrich     | 1M sodium hydroxide    | 200     |
| Uric acid               | 17775    | Uric acid                                     | Sigma-Aldrich     | 1M sodium hydroxide    | 2000    |
| Octanoylcarnitine       | 18102    | Octanoyl -L-carnitine HCl                     | VU medical center | Methanol               | 1       |
| Decanoylcarnitine       | 68830    | Decanoyl-L-carnitine HCl                      | VU medical center | Methanol               | 1       |
| Palmitoylcarnitine      | 17490    | Hexadecanoyl-L-carnitine HCL                  | VU medical center | Methanol               | 0,4     |
| Stearoylcarnitine       | 84644    | Octadecanoyl-L-carnitine HCl                  | VU medical center | Methanol               | 0,2     |
| Aspartic acid           | 22660    | DL-aspartic acid                              | Sigma-Aldrich     | 1M sodium hydroxide    | 160     |
| Citric acid             | 30769    | Citric acid                                   | Sigma-Aldrich     | Water                  | 800     |
| Lactic acid             | 422      | lactic acid lithium salt                      | Acros organics    | Water                  | 3000    |
| Isocitric acid          | 30887    | Isocitric acid                                | HMDB              | Water                  | 40      |
| Pyruvic acid            | 32816    | sodium pyruvate                               | Sigma-Aldrich     | Water                  | 400     |
| Aconitic acid           | 32805    | Cis-aconitic acid                             | Sigma-Aldrich     | Water                  | 225     |
| Alpha-ketoglutaric acid | 30915    | Alpha-ketoglutaric acid disodium salt hydrate | Fluka             | Water                  | 80      |
| 2-Hydroxybutyric acid   | 1148     | 2-Hydroxybutyric acid sodium salt (97%)       | Sigma-Aldrich     | Water                  | 400     |
| 3-Hydroxybutyric acid   | 20067    | 3-hydroxybutyric acid                         | Sigma-Aldrich     | Water                  | 800     |
| Malic acid              | 6650     | DL-Malic acid                                 | Sigma-Aldrich     | Water                  | 120     |
| Indoxyl sulfate         | 43355    | indoxyl sulfate potassium salt                | Sigma-Aldrich     | Methanol               | 20      |
| Alpha-linolenic acid    | 27432    | Alpha-linolenic acid                          | Cayman chemical   | Ethanol                | 10      |
| Docosahexaenoic acid    | 28125    | Docosahexaenoic acid                          | Cayman chemical   | Ethanol                | 4       |
| Docosapentaenoic acid   | 65136    | Docosapentaenoic acid                         | Cayman chemical   | Ethanol                | 2       |
| Linoleic acid           | 17351    | Linoleic acid                                 | Sigma-Aldrich     | Methanol               | 200     |
| Arachidonic acid        | 15843    | Arachidonic acid                              | Cayman chemical   | Ethanol                | 30      |
| Palmitic acid           | 15756    | Palmitic acid                                 | HMDB              | Methanol               | 200     |
| Oleic acid              | 16196    | Oleic acid                                    | Sigma-Aldrich     | Ethanol                | 200     |
| Stearic acid            | 28842    | Stearic acid                                  | Sigma-Aldrich     | Isopropanol            | 100     |

**Table S2. Internal standards. The C6 values are the concentrations ( $\mu\text{M}$ ) which were present in the internal standard solution. During sample preparation, the same volume of internal standard solution and plasma is added.**

| Name                   | Standard                       | Supplier             | Solvent              | C6 ( $\mu\text{M}$ ) |
|------------------------|--------------------------------|----------------------|----------------------|----------------------|
| Phenyl alanine         | DL-Phenyl-d5-alanine           | CDN isotopes         | Water                | 320                  |
| Trimethylamine-N-oxide | Trimethylamine N-oxide-D9      | Cambridge Isotope    | Water                | 160                  |
| Alanine                | DL-ALANINE-2,2,3,3-d3, 99.8% D | CDN isotopes         | Water                | 1600                 |
| Choline                | Choline-D4 Chloride            | CDN Isotopes         | Water                | 60                   |
| Carnitine              | L-carnitine-d3 HCl (methyl-d3) | CDN Isotopes         | Water                | 180                  |
| Creatinine             | Creatinine-D3                  | Cambridge Isotope    | Water                | 360                  |
| Valine                 | L-VALINE (D8)                  | Cambridge isotopes   | Water                | 800                  |
| Leucine                | DL-Leucine-D3                  | CDN Isotopes         | 1M hydrochloric acid | 240                  |
| Ornithine              | L-Ornithine-D6 hydrochloride   | CDN Isotopes         | Water                | 280                  |
| Hypoxanthine           | Hypoxanthine-D2                | CDN Isotopes         | 1M sodium hydroxide  | 140                  |
| Glutamine              | L-GLUTAMINE (2,3,3,4,4-D5)     | Cambridge isotopes   | Water                | 2000                 |
| Lysine                 | L-LYSINE 2 HCL (4,4,5,5-D4)    | Cambridge isotopes   | Water                | 720                  |
| Glutamic acid          | L-GLUTAMIC ACID (1,2-13C2)     | Cambridge isotopes   | 1M sodium hydroxide  | 400                  |
| Arginine               | L-Arginine-15N2 hydrochloride  | Cortecnet            | Water                | 400                  |
| Tryptophan             | L-TRYPTOPHAN (U-13C11, U15N2)  | Cambridge isotopes   | Water                | 200                  |
| Glucose                | Glucose-13C6                   | Cortecnet            | 90% methanol         | 20000                |
| Octanoylcarnitine      | Octanoyl carnitine-D3 HCl      | CDN Isotopes         | Methanol             | 0,8                  |
| Pyruvic acid           | Pyruvic acid-13C3              | Omicron Biochemicals | Water                | 140                  |
| Lactic acid            | Lactic acid-13C3               | Biomedical Isotopes  | Water                | 4000                 |
| Malic acid             | Malic acid-13C4                | Cambridge Isotope    | Water                | 24                   |
| Citric acid            | Citric acid-D4                 | Cambridge Isotope    | Water                | 480                  |
| Palmitic acid          | Palmitic acid-D2               | Cambridge Isotope    | Ethanol              | 480                  |
| Stearic acid           | Stearic acid-D3                | Cambridge Isotope    | Ethanol              | 200                  |

**Table S3. Solid-phase extraction column information**

| Brand    | Type | Phase            | Functional group                                | Amount of sorbent (mg) | Particle size ( $\mu\text{m}$ ) | pH stability | Loading buffer        | Elution buffer                |
|----------|------|------------------|-------------------------------------------------|------------------------|---------------------------------|--------------|-----------------------|-------------------------------|
| Hysphere | SCX  | PS-DVB           | Sulfonate                                       | 13                     | 10                              | 1-14         | 0.1% formic acid      | 100 mM ammonium acetate pH 10 |
| Hysphere | SAX  | PS-DVB           | Quaternary amine                                | 13                     | 10                              | 1-14         | 5 mM ammonium acetate | 1% formic acid                |
| Oasis    | WCX  | Oasis HLB        | Carboxylate                                     | 10.4                   | 30                              | 0-14         | 5 mM ammonium acetate | 1% formic acid                |
| Oasis    | WAX  | Oasis HLB        | tertiary/secondary amine                        | 10.4                   | 30                              | 0-14         | 5 mM ammonium acetate | 100 mM ammonium formate pH 10 |
| Sepax    | SCX  | PS-DVB           | Sulfonate                                       | Not disclosed          | 3                               | 2-12         | 0.1% formic acid      | 100 mM ammonium acetate pH 10 |
| Sepax    | SAX  | PS-DVB           | Quaternary amine                                | Not disclosed          | 1.7                             | 2-12         | 5 mM ammonium acetate | 1% formic acid                |
| Sepax    | WCX  | PS-DVB           | Carboxylate                                     | Not disclosed          | 1.7                             | 2-12         | 5 mM ammonium acetate | 1% formic acid                |
| Sepax    | WAX  | PS-DVB           | Tertiary amine                                  | Not disclosed          | 5                               | 2-12         | 5 mM ammonium acetate | 100 mM ammonium formate pH 10 |
| Zirchrom | SCX  | Zirconia dioxide | Ethylenediamine-N,N'-tetramethylphosphonic acid | 150                    | 3                               | 1-10         | 0.1% formic acid      | 100 mM ammonium acetate pH 10 |
| Zirchrom | SAX  | Zirconia dioxide | Polyethyleneimine                               | 150                    | 3                               | 1-12         | 5 mM ammonium acetate | 1% formic acid                |
| Zirchrom | WCX  | Zirconia dioxide | Phosphate                                       | 150                    | 3                               | 1-10         | 5 mM ammonium acetate | 1% formic acid                |
| Zirchrom | WAX  | Zirconia dioxide | Polyethyleneimine                               | 150                    | 3                               | 3-9          | 5 mM ammonium acetate | 100 mM ammonium formate pH 9  |

**Table S4. Fractionation LC and valve parameters for positive mode**

| Time (min) | Flow rate (ml/min) | %A  | %B  | IEX mobile phase | WAX and SCX columns |
|------------|--------------------|-----|-----|------------------|---------------------|
| 0.00       | 0.8                | 100 | 0   | Out              | In                  |
| 0.40       | 0.8                | 100 | 0   | In               | In                  |
| 1.00       | 0.8                | 100 | 0   | Out              | In                  |
| 1.01       | 0.8                | 0   | 100 | Out              | Out                 |
| 2.10       | 0.8                | 0   | 100 | Out              | Out                 |
| 2.11       | 0.8                | 100 | 0   | Out              | Out                 |
| 2.35       | 0.8                | 100 | 0   | Out              | In                  |
| 3.00       | 0.8                | 100 | 0   | Out              | In                  |

**Table S5. Fractionation LC and valve parameters for negative mode**

| Time (min) | Flow rate (mL/min) | %A  | %B  | IEX mobile phase | WAX column |
|------------|--------------------|-----|-----|------------------|------------|
| 0.00       | 0.5                | 100 | 0   | Out              | In         |
| 0.25       | 0.5                | 100 | 0   | In               | In         |
| 0.30       | 0.5                | 100 | 0   | In               | In         |
| 0.31       | 0.8                | 100 | 0   | In               | In         |
| 0.75       | 0.8                | 100 | 0   | Out              | Out        |
| 0.76       | 0.8                | 20  | 80  | Out              | Out        |
| 0.95       | 0.8                | 15  | 85  | Out              | Out        |
| 0.96       | 0.8                | 0   | 100 | Out              | Out        |
| 2.00       | 0.8                | 0   | 100 | Out              | Out        |
| 2.01       | 0.8                | 100 | 0   | Out              | Out        |
| 2.25       | 0.8                | 100 | 0   | Out              | In         |
| 3.00       | 0.8                | 100 | 0   | Out              | In         |

**Table S6. Mass spectrometry parameters**

| Platform                    | Polarity | Gas 1 (psi) | Gas 2 (psi) | Curtain gas (psi) | Temp (°C) | Spray voltage (V) | Declustering Potential (V) | Collision energy (eV) | Mass range (m/z) |
|-----------------------------|----------|-------------|-------------|-------------------|-----------|-------------------|----------------------------|-----------------------|------------------|
| Fractionation, RP and HILIC | Positive | 40          | 60          | 40                | 650       | 5500              | 80                         | 5                     | 50-880           |
|                             | Negative | 40          | 60          | 40                | 650       | -4500             | -60                        | -5                    | 50-880           |
| FIA                         | Positive | 40          | 40          | 30                | 550       | 5500              | 80                         | 5                     | 50-500           |
|                             | Negative | 40          | 40          | 30                | 550       | -4500             | -80                        | -5                    | 50-500           |

**Table S7. Overview of the different fractions**

| Compounds               | pH at loading | Method   | Net charge during loading | Fraction         | Compound class     |
|-------------------------|---------------|----------|---------------------------|------------------|--------------------|
| Valine/Betaine          | 2.5           | Positive | + /neutral                | Flow-through     | Amino acids/Amines |
| Leucine/Isoleucine      | 2.5           | Positive | + /neutral                | Flow-through     | Amino acids        |
| Tryptophan              | 2.5           | Positive | + /neutral                | SCX              | Amino acids        |
| Trimethylamine-N-oxide  | 2.5           | Positive | Neutral                   | Flow-through     | Amines             |
| Ornithine               | 2.5           | Positive | + /++                     | SCX              | Amino acids        |
| Carnitine               | 2.5           | Positive | + /neutral                | Flow-through     | Amines             |
| 1/3-methylhistidine     | 2.5           | Positive | + /++                     | SCX              | Amino acids        |
| Phenylalanine           | 2.5           | Positive | + /neutral                | Flow-through     | Amino acids        |
| Serine                  | 2.5           | Positive | + /neutral                | Flow-through     | Amino acids        |
| Citrulline              | 2.5           | Positive | + /neutral                | Flow-through     | Amino acids        |
| Methionine              | 2.5           | Positive | + /neutral                | Flow-through     | Amino acids        |
| Arginine                | 2.5           | Positive | + /++                     | SCX              | Amino acids        |
| Alanine                 | 2.5           | Positive | + /neutral                | Flow-through     | Amino acids        |
| Cystine                 | 2.5           | Positive | + /++ /neutral            | SCX              | Amino acids        |
| Aspartic acid           | 2.5           | Positive | + /neutral                | Flow-through     | Amino acids        |
| Glutamic acid           | 2.5           | Positive | + /neutral                | Flow-through     | Amino acids        |
| Histidine               | 2.5           | Positive | + /++                     | SCX              | Amino acids        |
| Lysine                  | 2.5           | Positive | + /++                     | SCX              | Amino acids        |
| Proline                 | 2.5           | Positive | + /neutral                | Flow-through     | Amino acids        |
| Threonine               | 2.5           | Positive | + /neutral                | Flow-through     | Amino acids        |
| Urea                    | 2.5           | Positive | Neutral                   | Flow-through     | Amines             |
| Glutamine               | 2.5           | Positive | + /neutral                | Flow-through     | Amino acids        |
| Glucose                 | 2.5           | Positive | Neutral                   | Flow-through     | Hexose             |
| Tyrosine                | 2.5           | Positive | + /neutral                | Flow-through     | Amino acids        |
| Choline                 | 2.5           | Positive | +                         | Flow-through     | Amines             |
| Hypoxanthine            | 2.5           | Positive | + /neutral                | Flow-through     | Purines            |
| Guanine                 | 2.5           | Positive | + /neutral                | Flow-through     | Purines            |
| Uric acid               | 2.5           | Positive | Neutral                   | Flow-through     | Amines             |
| Creatinine              | 2.5           | Positive | +                         | Flow-through/SCX | Amines             |
| Taurine                 | 2.5           | Positive | Neutral                   | Flow-through     | Amino acids        |
| Palmitoylcarnitine      | 2.5           | Positive | + /neutral                | C18              | Acylcarnitines     |
| Stearoylcarnitine       | 2.5           | Positive | + /neutral                | C18              | Acylcarnitines     |
| Decanoylcarnitine       | 2.5           | Positive | + /neutral                | C18              | Acylcarnitines     |
| Octanoylcarnitine       | 2.5           | Positive | + /neutral                | C18              | Acylcarnitines     |
| (Iso)Citric acid        | 7             | Negative | -3                        | WAX              | Organic acids      |
| Malic acid              | 7             | Negative | -2                        | WAX              | Organic acids      |
| Lactic acid             | 7             | Negative | -                         | Flow-through     | Organic acids      |
| Pyruvic acid            | 7             | Negative | -                         | Flow-through     | Organic acids      |
| Aconitic acid           | 7             | Negative | -3                        | WAX              | Organic acids      |
| Alpha-ketoglutaric acid | 7             | Negative | -2                        | WAX              | Organic acids      |
| 2/3-Hydroxybutyric acid | 7             | Negative | -                         | Flow-through     | Organic acids      |
| Indoxylsulfate          | 7             | Negative | -(sulfate)                | WAX              | Organic acids      |
| Palmitic acid           | 7             | Negative | -                         | C18              | Fatty acids        |
| Stearic acid            | 7             | Negative | -                         | C18              | Fatty acids        |
| Alpha-linolenic acid    | 7             | Negative | -                         | C18              | Fatty acids        |
| Docosahexaenoic acid    | 7             | Negative | -                         | C18              | Fatty acids        |
| Docosapentaenoic acid   | 7             | Negative | -                         | C18              | Fatty acids        |
| Linoleic acid           | 7             | Negative | -                         | C18              | Fatty acids        |
| Arachidonic acid        | 7             | Negative | -                         | C18              | Fatty acids        |
| Oleic acid              | 7             | Negative | -                         | C18              | Fatty acids        |

**Table S8. Method validation parameters (CO = carryover and ME = matrix effect)**

| Name                 | Labeled ISTD | Repeatability    |                  |                  | Intermediate precision |                  |                  | CO (1 <sup>st</sup> ) | CO (2 <sup>nd</sup> ) | R <sup>2</sup> | ME (%) | LOD (µM) | LLOQ (µM) |
|----------------------|--------------|------------------|------------------|------------------|------------------------|------------------|------------------|-----------------------|-----------------------|----------------|--------|----------|-----------|
|                      |              | C0<br>RSD<br>(%) | C2<br>RSD<br>(%) | C4<br>RSD<br>(%) | C0<br>RSD<br>(%)       | C2<br>RSD<br>(%) | C4<br>RSD<br>(%) |                       |                       |                |        |          |           |
| Val/Bet              | Val          | 1.6              | 2.0              | 1.4              | 3.4                    | 2.8              | 2.3              | 0.0                   | 0.0                   | 0.992          | 71     | 0.4      | 1         |
| Leu/Ile              | Leu          | 2.9              | 1.1              | 1.7              | 2.5                    | 3.1              | 2.9              | 0.0                   | 0.0                   | 0.993          | 65     | 0.5      | 1         |
| Trp                  | Tryp         | 5.8              | 0.9              | 2.0              | 4.7                    | 1.8              | 2.4              | 0.0                   | 0.0                   | 0.997          | 336    | 0.3      | 1         |
| TMAO                 | TMAO         | 18.1             | 3.6              | 1.0              | 14.8                   | 7.5              | 3.1              | 0.0                   | 0.0                   | 0.999          | 54     | 0.4      | 1         |
| Orn                  | Lys          | 13.9             | 3.4              | 1.4              | 11.1                   | 6.5              | 3.8              | 0.0                   | 0.0                   | 0.994          | 137    | 3        | 10        |
| Carnitine            | Car          | 3.8              | 0.1              | 2.0              | 3.0                    | 1.4              | 1.7              | 0.0                   | 0.0                   | 1.000          | 54     | 0.01     | 0.03      |
| 1/3-Mhis             | Arg          | 10.5             | 0.8              | 1.4              | 8.8                    | 1.7              | 2.0              | 0.0                   | 0.0                   | 0.996          |        |          |           |
| Phe                  | Phe          | 6.6              | 1.6              | 3.6              | 7.2                    | 5.9              | 4.9              | 0.0                   | 0.0                   | 0.993          | 36     | 1        | 4         |
| Ser                  | Val          | 6.3              | 2.4              | 1.9              | 4.9                    | 4.6              | 4.2              | 0.0                   | 0.0                   | 0.994          |        |          |           |
| Cit                  | Val          | 3.9              | 2.1              | 2.6              | 6.0                    | 4.7              | 5.8              | 0.0                   | 0.0                   | 0.997          |        |          |           |
| Met                  | Val          | 5.4              | 1.8              | 1.6              | 5.1                    | 3.8              | 3.5              | 5.3                   | 1.5                   | 0.999          |        |          |           |
| Arg                  | Arg          | 3.3              | 1.2              | 0.8              | 3.6                    | 1.8              | 2.3              | 2.0                   | 0.0                   | 0.999          | 89     | 0.2      | 0.5       |
| Ala                  | Glu          | 4.7              | 1.4              | 3.8              | 5.2                    | 2.3              | 3.8              | 0.0                   | 0.0                   | 0.997          | 68     | 8        | 27        |
| Cys-Cys              | Lys          | 6.0              | 2.2              | 3.7              | 7.9                    | 3.3              | 5.0              | 0.0                   | 0.0                   | 0.991          |        |          |           |
| Asp                  | Val          | 4.8              | 3.7              | 4.3              | 5.9                    | 6.3              | 4.2              | 0.0                   | 0.0                   | 0.995          |        |          |           |
| Glu                  | Leu          | 3.2              | 0.7              | 1.4              | 3.2                    | 3.5              | 2.4              | 0.0                   | 0.0                   | 0.996          | 91     | 0.9      | 1         |
| His                  | Arg          | 12.1             | 1.6              | 0.9              | 10.0                   | 4.6              | 2.9              | 0.5                   | 0.1                   | 0.995          |        |          |           |
| Lys                  | Lys          | 4.3              | 2.7              | 3.3              | 3.6                    | 3.0              | 3.1              | 0.0                   | 0.0                   | 0.995          | 130    | 1        | 4         |
| Pro                  | Val          | 2.3              | 1.9              | 2.4              | 1.8                    | 2.1              | 1.6              | 0.0                   | 0.0                   | 0.998          |        |          |           |
| Thr                  | glu          | 5.7              | 1.8              | 3.2              | 4.2                    | 4.7              | 2.4              | 0.0                   | 0.0                   | 0.995          |        |          |           |
| Urea                 | Phe          | 4.2              | 3.9              | 3.4              | 4.7                    | 3.1              | 2.4              | 0.0                   | 0.0                   | 0.993          |        |          |           |
| Gln                  | glu          | 3.6              | 0.7              | 2.0              | 2.7                    | 1.9              | 1.8              | 0.0                   | 0.0                   | 0.999          | 69     | 1        | 4         |
| Glucose              | Glucose      | 7.2              | 1.2              | 7.9              | 5.3                    | 2.7              | 5.1              | 0.0                   | 0.0                   | 0.998          | 77     | 3        | 10        |
| Tyr                  | Glu          | 2.2              | 6.4              | 3.7              | 4.4                    | 7.6              | 4.1              | 0.0                   | 0.0                   | 0.999          |        |          |           |
| Choline              | Choline      | 3.4              | 1.4              | 1.2              | 2.7                    | 1.5              | 1.6              | 0.0                   | 0.0                   | 0.999          | 81     | 0.04     | 0.1       |
| Hyp                  | Phe          | 6.6              | 4.2              | 1.2              | 12.1                   | 4.9              | 2.7              | 0.0                   | 0.0                   | 0.998          |        |          |           |
| Gua                  | Leu          | 18.9             | 8.2              | 6.5              | 15.4                   | 8.8              | 6.7              | 0.0                   | 0.0                   | 0.991          |        |          |           |
| Urate                | Glu          | 1.6              | 2.2              | 1.3              | 2.3                    | 3.7              | 4.3              | 0.0                   | 0.0                   | 0.991          |        |          |           |
| Creat                | Creat        | 4.2              | 0.4              | 1.5              | 3.4                    | 1.3              | 1.3              | 0.0                   | 0.0                   | 0.999          | 49     | 0.09     | 0.3       |
| Tau                  | Glu          | 3.2              | 2.1              | 2.6              | 3.7                    | 4.4              | 4.4              | 0.0                   | 0.0                   | 0.997          |        |          |           |
| C16 carnitine        | C8 carnitine | 3.8              | 4.0              | 1.4              | 5.5                    | 9.0              | 10.0             | 1.8                   | 0.0                   | 0.982          |        |          |           |
| C18 carnitine        | C8 carnitine | 11.6             | 6.0              | 3.3              | 11.2                   | 11.7             | 6.9              | 0.0                   | 0.0                   | 0.987          |        |          |           |
| C10 carnitine        | C8 carnitine | 4.1              | 1.4              | 5.4              | 9.1                    | 6.0              | 8.6              | 2.4                   | 1.3                   | 0.990          |        |          |           |
| C8 carnitine         | C8 carnitine | 4.6              | 3.1              | 5.0              | 5.8                    | 3.8              | 4.1              | 0.0                   | 0.0                   | 0.994          | 98     | 0.002    | 0.003     |
| Citrate              | Citrate      | 1.5              | 1.3              | 3.5              | 2.0                    | 1.8              | 3.3              | 0.3                   | 0.2                   | 0.999          | 562    | 0.7      | 1         |
| Malate               | Malate       | 10.6             | 3.2              | 0.6              | 14.7                   | 5.1              | 3.9              | 0.4                   | 0.0                   | 0.993          | 75     | 0.4      | 0.9       |
| Lactate              | Lactate      | 1.5              | 0.7              | 4.1              | 1.9                    | 3.0              | 2.7              | 0.0                   | 0.0                   | 0.991          | 34     | 5        | 13        |
| Pyruvate             | Lactate      | 4.0              | 4.8              | 2.9              | 4.9                    | 4.9              | 5.0              | 0.0                   | 0.0                   | 0.993          | 41     | 9        | 19        |
| Aconate              | Citrate      | 5.8              | 1.9              | 3.2              | 8.5                    | 4.7              | 3.6              | 0.9                   | 0.0                   | 0.998          |        |          |           |
| α-keto-glutarate     | Citrate      | 8.5              | 7.3              | 4.1              | 11.4                   | 6.8              | 6.6              | 2.0                   | 0.1                   | 0.996          |        |          |           |
| 2/3-hydroxy-butyrate | Lactate      | 8.3              | 0.6              | 0.7              | 7.0                    | 4.0              | 3.2              | 0.0                   | 0.0                   | 0.999          |        |          |           |
| Indoxyl-sulfate      | Citrate      | 3.1              | 3.7              | 7.3              | 9.6                    | 6.7              | 8.0              | 0.0                   | 0.0                   | 0.995          |        |          |           |
| FA(16:0)*            | FA(16:0)     | 8.9              | 10.1             | 10.9             | 13.5                   | 8.6              | 11.0             | 0.8                   | 0.0                   | 0.996          | 94     | 0.6      | 0.7       |
| FA(18:0)*            | FA(16:0)     | 9.2              | 6.6              | 5.0              | 14.4                   | 8.4              | 9.7              | 0.0                   | 0.0                   | 0.996          | 98     | 0.2      | 0.6       |
| FA(18:3)             | FA(16:0)     | 3.6              | 3.7              | 0.9              | 13.6                   | 14.3             | 6.9              | 1.9                   | 0.8                   | 0.996          |        |          |           |
| FA(22:6)             | FA(16:0)     | 7.6              | 2.3              | 0.3              | 6.9                    | 4.5              | 6.2              | 0.4                   | 0.0                   | 0.998          |        |          |           |
| FA(22:5)             | FA(18:0)     | 6.3              | 12.6             | 2.5              | 7.9                    | 10.7             | 6.8              | 1.6                   | 0.3                   | 0.974          |        |          |           |
| FA(18:2)             | FA(18:0)     | 5.0              | 3.3              | 2.2              | 11.6                   | 5.6              | 2.7              | 1.2                   | 0.3                   | 0.998          |        |          |           |
| FA(20:4)             | FA(18:0)     | 4.9              | 3.0              | 1.9              | 7.9                    | 3.8              | 4.5              | 2.0                   | 0.6                   | 0.998          |        |          |           |
| FA(18:1)             | FA(18:0)     | 3.7              | 6.0              | 2.1              | 4.7                    | 6.4              | 5.2              | 0.9                   | 0.1                   | 0.996          | 562    |          |           |

\*high background signals experienced. Background subtraction was used to account for this.



**Table S9. The matrix effect and fraction of 22 internal standards in fractionation, liquid-liquid extraction coupled to flow injection analysis (LLE-FIA) and flow injection analysis (FIA). An ion suppression of 0% indicates a compound that is either enhanced or not suppressed. An ion suppression of 100% means that the compound is not detected**

| Compounds              | Fractionation     |                  | LLE-FIA           |          | FIA               |
|------------------------|-------------------|------------------|-------------------|----------|-------------------|
|                        | Matrix effect (%) | Fraction         | Matrix effect (%) | fraction | Matrix effect (%) |
| Valine-d8              | 71                | Flow-through     | 5                 | Polar    | 1                 |
| Leucine-d3             | 65                | Flow-through     | 4                 | Polar    | 0                 |
| Tryptophan-13C11, 15N2 | 336               | SCX              | 4                 | Polar    | 0                 |
| TMAO-d9                | 54                | Flow-through     | 9                 | Polar    | 4                 |
| Ornithine d6           | 137               | SCX              | 2                 | Polar    | 0                 |
| Carnitine-d3           | 54                | Flow-through     | 14                | Polar    | 6                 |
| Phenylalanine-d5       | 36                | Flow-through     | 4                 | Polar    | 1                 |
| Arginine-15N2          | 89                | SCX              | 7                 | Polar    | 3                 |
| Alanine-d3             | 68                | Flow-through     | 0                 | Polar    | 0                 |
| Glutamic acid-13C2     | 91                | Flow-through     | 0                 | Polar    | 0                 |
| Lysine-d4              | 130               | SCX              | 5                 | Polar    | 2                 |
| Glutamine-d5           | 69                | Flow-through     | 1                 | Polar    | 0                 |
| Glucose-13C6           | 77                | Flow-through     | 25                | Polar    | 17                |
| Choline-d4             | 81                | Flow-through/SCX | 24                | Polar    | 14                |
| Creatinine-d3          | 49                | Flow-through     | 20                | Polar    | 6                 |
| Octanoyl carnitine-d3  | 98                | C18              | 32                | Apolar   | 8                 |
| Citric acid-D4         | 562               | WAX              | 86                | Polar    | 677               |
| Malic acid-13C4        | 75                | WAX              | 19                | Polar    | 24                |
| Lactic acid-13C3       | 34                | Flow-through     | 14                | Polar    | 14                |
| Pyruvic acid-13C3      | 41                | Flow-through     | 11                | Polar    | 15                |
| Palmitic acid-D2       | 94                | C18              | 76                | Apolar   | 12                |
| Stearic-D3             | 98                | C18              | 70                | Apolar   | 10                |

**Table S10. The LLOQ of literature LC-MS methods. The LLOQ determination, MS mode, derivatization, analysis time and reference are also indicated in the table.**

|                | LLOQ (µM) | LLOQ determination | MS mode         | Derivatization | Analysis time (min) | Reference                            |
|----------------|-----------|--------------------|-----------------|----------------|---------------------|--------------------------------------|
| Valine         | 10        | Unknown            | Tandem          | Yes            | 7                   | Trabado <i>et al.</i> <sup>1</sup>   |
| Leucine        | 10        | Unknown            | Tandem          | Yes            | 7                   | Trabado <i>et al.</i> <sup>1</sup>   |
| Tryptophan     | 5         | Unknown            | Tandem          | Yes            | 7                   | Trabado <i>et al.</i> <sup>1</sup>   |
| TMAO           | 0.1       | S/N                | Tandem          | No             | 10                  | Liu <i>et al.</i> <sup>2</sup>       |
| Ornithine      | 5         | Unknown            | Tandem          | Yes            | 7                   | Trabado <i>et al.</i> <sup>1</sup>   |
| Carnitine      | 0.06      | S/N                | Tandem          | No             | 10                  | Liu <i>et al.</i> <sup>2</sup>       |
| Phenyl alanine | 5         | Unknown            | Tandem          | Yes            | 7                   | Trabado <i>et al.</i> <sup>1</sup>   |
| Arginine       | 5         | Unknown            | Tandem          | Yes            | 7                   | Trabado <i>et al.</i> <sup>1</sup>   |
| Alanine        | 20        | Unknown            | Tandem          | Yes            | 7                   | Trabado <i>et al.</i> <sup>1</sup>   |
| Glutamic acid  | 5         | Unknown            | Tandem          | Yes            | 7                   | Trabado <i>et al.</i> <sup>1</sup>   |
| Lysine         | 10        | Unknown            | Tandem          | Yes            | 7                   | Trabado <i>et al.</i> <sup>1</sup>   |
| Glutamine      | 20        | Unknown            | Tandem          | Yes            | 7                   | Trabado <i>et al.</i> <sup>1</sup>   |
| Glucose        | 11        | S/N                | Tandem          | No             | 4                   | Matsunami <i>et al.</i> <sup>3</sup> |
| Choline        | 0.1       | S/N                | Tandem          | No             | 10                  | Liu <i>et al.</i> <sup>2</sup>       |
| Creatinine     | 10        | Unknown            | Tandem          | Yes            | 7                   | Trabado <i>et al.</i> <sup>1</sup>   |
| C8 carnitine   | 0.006     | S/N                | Tandem          | Yes            | 22                  | Giesbertz <i>et al.</i> <sup>4</sup> |
| Citrate        | 0.2       | S/N                | Tandem          | No             | Unknown             | Kadhi <i>et al.</i> <sup>5</sup>     |
| Malate         | 0.2       | S/N                | Tandem          | No             | Unknown             | Kadhi <i>et al.</i> <sup>5</sup>     |
| Lactate        | 3         | S/N                | Tandem          | No             | Unknown             | Kadhi <i>et al.</i> <sup>5</sup>     |
| Pyruvate       | 1         | Unknown            | Tandem          | No             | 3.5                 | Chuang <i>et al.</i> <sup>6</sup>    |
| FA(16:0)       | 0.8       | Calibration curve  | High-resolution | No             | 15                  | Takahashi <i>et al.</i> <sup>7</sup> |
| FA(18:0)       | 0.07      | calibration curve  | High-resolution | No             | 15                  | Takahashi <i>et al.</i> <sup>7</sup> |

#### References Table S10

1. Trabado, S. *et al.* The human plasma-metabolome: Reference values in 800 French healthy volunteers; Impact of cholesterol, gender and age. *PLoS One* **12**, 1–17 (2017).
2. Liu, J. *et al.* Simultaneous targeted analysis of trimethylamine-N-oxide, choline, betaine, and carnitine by high performance liquid chromatography tandem mass spectrometry. *J. Chromatogr. B Anal. Technol. Biomed. Life Sci.* **1035**, 42–48 (2016).
3. Matsunami, R. K., Angelides, K. & Engler, D. A. Development and validation of a rapid <sup>13</sup>C6-Glucose Isotope Dilution UPLC-MRM Mass Spectrometry Method for Use in determining system accuracy and performance of blood glucose monitoring devices. *J. Diabetes Sci. Technol.* **9**, 1051–1060 (2015).
4. Giesbertz, P., Ecker, J., Haag, A., Spanier, B. & Daniel, H. An LC-MS/MS method to quantify acylcarnitine species including isomeric and odd-numbered forms in plasma and tissues. *J. Lipid Res.* **56**, 2029–2039 (2015).
5. Al Kadhi, O., Melchini, A., Mithen, R. & Saha, S. Development of a LC-MS/MS Method for the Simultaneous Detection of Tricarboxylic Acid Cycle Intermediates in a Range of Biological Matrices. *J. Anal. Methods Chem.* **2017**, 1–12 (2017).
6. Chuang, C. K. *et al.* A method for lactate and pyruvate determination in filter-paper dried blood spots. *J. Chromatogr. A* **1216**, 8947–8952 (2009).
7. TAKAHASHI, H. *et al.* Long-Chain Free Fatty Acid Profiling Analysis by Liquid Chromatography–Mass Spectrometry in Mouse Treated with Peroxisome Proliferator-Activated Receptor  $\alpha$  Agonist. *Biosci. Biotechnol. Biochem.* **77**, 2288–2293 (2013).

**Table S11A.** The reversed phase (RP) gradient performed on an UPLC HSS T3 (1.7  $\mu\text{m}$ , 2.1 x 100 mm). Mobile phase A and B consisted of 0.1% formic acid in water and acetonitrile, respectively. The column oven was set at 30 °C. The sample preparation, injection volume and MS parameters were similar to the fractionation method.

| Time (min) | Mobile phase B (%) | Flow rate (mL/min) |
|------------|--------------------|--------------------|
| 0.0        | 0                  | 0.4                |
| 7.0        | 15                 | 0.4                |
| 10         | 55                 | 0.4                |
| 10.5       | 100                | 0.4                |
| 12.5       | 100                | 0.4                |
| 12.6       | 0                  | 0.4                |
| 15.0       | 0                  | 0.4                |

**Table S11B.** The hydrophilic interaction liquid chromatography (HILIC) gradient performed on a Sequant ZIC-HILIC (3  $\mu\text{m}$ , 2.1 x 100 mm). Mobile phase A consisted of 10 mM ammonium formate and 0.075% formic acid in 90/10 (v/v) acetonitrile/water and mobile phase B of 10 mM ammonium formate and 0.075% formic acid in 10/90 (v/v) acetonitrile/water. The column oven was set at 30 °C. The sample preparation, injection volume and MS parameters were similar to the fractionation method.

| Time (min) | Mobile phase B (%) | Flow rate (mL/min) |
|------------|--------------------|--------------------|
| 0.0        | 0                  | 0.5                |
| 1.2        | 0                  | 0.5                |
| 9.16       | 75                 | 0.5                |
| 14.0       | 75                 | 0.5                |
| 14.2       | 0                  | 0.5                |
| 18.0       | 0                  | 0.5                |

**Table S11C.** The number of detectable features in the fractionation, RP and HILIC method as determined by the 'Non-targeted Peaks' function in Analytics of Sciex OS 1.6. The minimum retention time was determined by the dead volume of the platform and the maximum retention time was determined by the start of the column equilibration. The peak detection sensitivity was set at exhaustive, the Area Ratio Threshold (Unknown/Control) was set at 0 and the 'Group peaks by adduct or charge' function was checked. The number of features was corrected for the presence of multiple adducts. Feature m/z values were rounded to two decimal points. Features that were identified in both positive and negative mode were indicated as one feature. All individual features are reported in a separated excel file, called: 'detected\_features.xlsx'.

| Platform      | Unique retention time and m/z features | Unique m/z features |
|---------------|----------------------------------------|---------------------|
| Fractionation | 2289                                   | 2089                |
| RP            | 3475                                   | 2465                |
| HILIC         | 3529                                   | 2325                |

**Table S12. P-values and FDR adjusted p-values of several compound classes on different time points in comparison to baseline levels**

| Compound class | Time after breakfast (hours) | P-value | FDR adjusted p-value |
|----------------|------------------------------|---------|----------------------|
| Amino acids    | 0.5                          | 0.006   | 0.063                |
|                | 1.5                          | 0.004   | 0.046                |
|                | 3                            | 0.002   | 0.032                |
|                | 4.5                          | 0.002   | 0.032                |
|                | 6                            | 0.037   | 0.296                |
|                | 9.5                          | 0.16    | 0.942                |
|                | 11                           | 0.002   | 0.032                |
|                | 12                           | 0.002   | 0.032                |
|                | 24                           | 0.131   | 0.829                |
| Amines         | 0.5                          | 0.846   | 1                    |
|                | 1.5                          | 0.557   | 1                    |
|                | 3                            | 0.232   | 1                    |
|                | 4.5                          | 0.105   | 0.686                |
|                | 6                            | 0.064   | 0.498                |
|                | 9.5                          | 0.084   | 0.576                |
|                | 11                           | 0.084   | 0.576                |
|                | 12                           | 0.557   | 1                    |
|                | 24                           | 0.16    | 0.942                |
| Acylcarnitines | 0.5                          | 0.014   | 0.13                 |
|                | 1.5                          | 0.002   | 0.032                |
|                | 3                            | 0.002   | 0.032                |
|                | 4.5                          | 0.002   | 0.032                |
|                | 6                            | 0.002   | 0.032                |
|                | 9.5                          | 0.006   | 0.063                |
|                | 11                           | 0.002   | 0.032                |
|                | 12                           | 0.002   | 0.032                |
|                | 24                           | 0.232   | 1                    |
| Hexose         | 0.5                          | 0.02    | 0.166                |
|                | 1.5                          | 0.77    | 1                    |
|                | 3                            | 0.922   | 1                    |
|                | 4.5                          | 0.002   | 0.032                |
|                | 6                            | 0.557   | 1                    |
|                | 9.5                          | 0.16    | 0.942                |
|                | 11                           | 0.002   | 0.032                |
|                | 12                           | 0.084   | 0.576                |
|                | 24                           | 1       | 1                    |
| Organic acids  | 0.5                          | 0.002   | 0.034                |
|                | 1.5                          | 0.004   | 0.046                |
|                | 3                            | 0.846   | 1                    |
|                | 4.5                          | 0.006   | 0.058                |
|                | 6                            | 0.846   | 1                    |
|                | 9.5                          | 0.105   | 0.686                |
|                | 11                           | 0.002   | 0.034                |
|                | 12                           | 0.02    | 0.166                |
|                | 24                           | 0.006   | 0.058                |
| Fatty acids    | 0.5                          | 0.193   | 1                    |
|                | 1.5                          | 0.004   | 0.046                |
|                | 3                            | 0.004   | 0.046                |
|                | 4.5                          | 0.004   | 0.046                |
|                | 6                            | 0.004   | 0.046                |
|                | 9.5                          | 0.105   | 0.686                |
|                | 11                           | 0.037   | 0.296                |
|                | 12                           | 0.004   | 0.046                |
|                | 24                           | 0.01    | 0.097                |
